# Supplementary material for: Nb2O5 quantum dots embedded in MOF derived nitrogen-doped porous carbon for advanced hybrid supercapacitor applications
Source: Royal Society of Chemistry journal article supplement (doi:10.1039/c6ta07856g), 2016-01-01
Supplement: c6ta07856g1.pdf [file c6ta07856g1.pdf]

## Electronic Supporting Information

### **Nb<sub>2</sub>O<sub>5</sub> Quantum Dots embedded in ZIF-8 derived Nitrogen-Doped Porous Carbon Dodecahedrons for Advanced Hybrid Supercapacitors Applications**

Sainan Liu<sup>a</sup>, Jiang Zhou<sup>\*a,b</sup>, Zhenyang Cai<sup>a</sup>, Guozhao Fang<sup>a</sup>, Yangsheng Cai<sup>a</sup>, Anqiang Pan<sup>a,b</sup>,  
and Shuquan Liang<sup>\*a,b</sup>

<sup>a</sup> *School of Materials Science and Engineering, Central South University, Changsha 410083, Hunan, China*

<sup>b</sup> *Key Laboratory of Nonferrous Metal Materials Science and Engineering, Ministry of Education, Central South University, Changsha 410083, Hunan, China*

---

Corresponding author: Tel.: +86 0731-88836069. Fax: +86 0731-88876692.  
E-mail address: [zhou\\_jiang@csu.edu.cn](mailto:zhou_jiang@csu.edu.cn) (J. Zhou), [lsq@csu.edu.cn](mailto:lsq@csu.edu.cn) (S. Liang)

## Figures and Tables

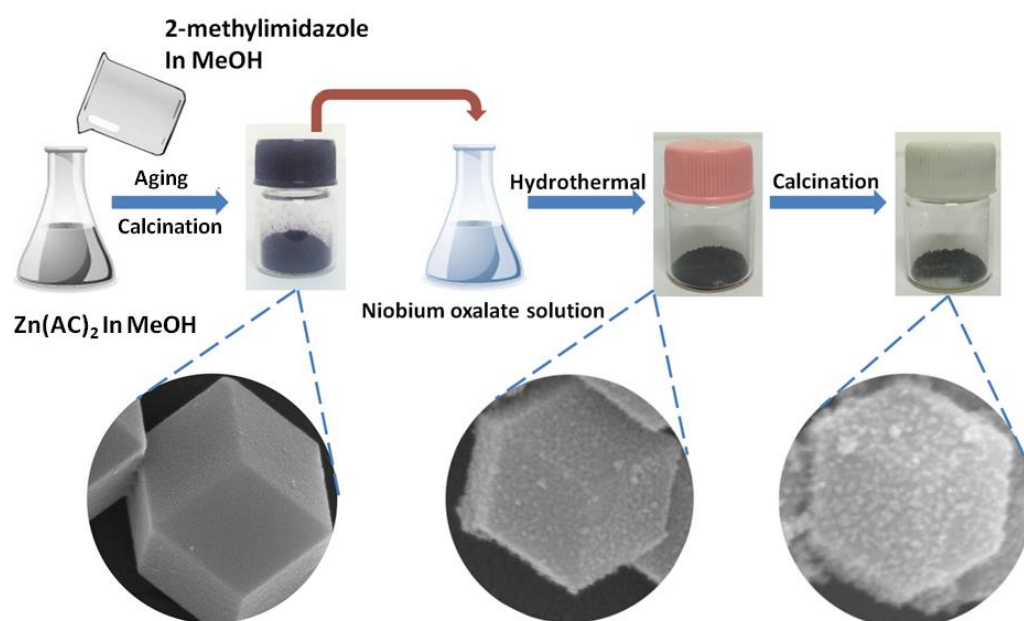

**Figure S1** Schematic illustration of the fabrication of NQD-NC.

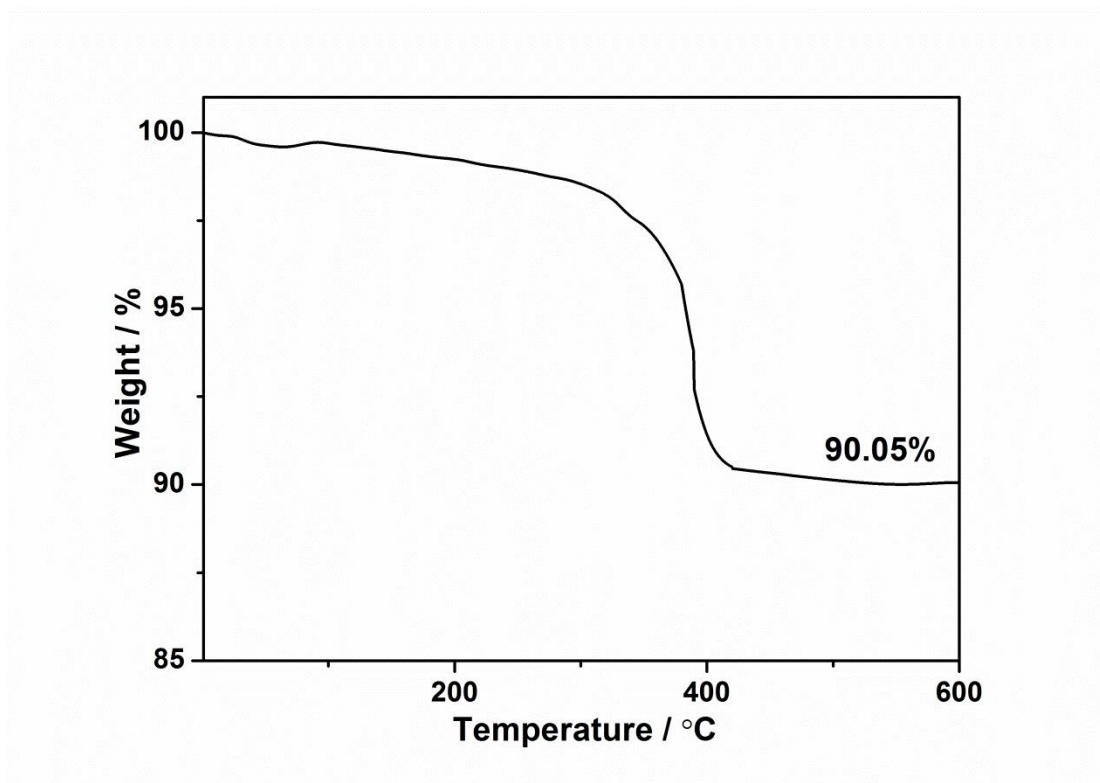

**Figure S2** TGA curve of the NQD-NC.

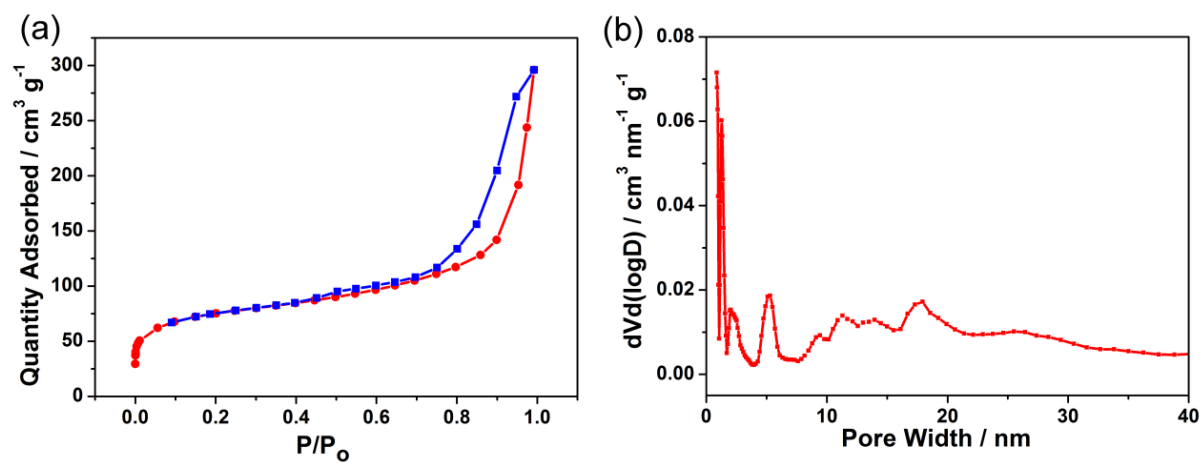

**Figure S3** (a) N<sub>2</sub> adsorption-desorption isotherm for NQD-NC, (b) The corresponding pore size distribution.

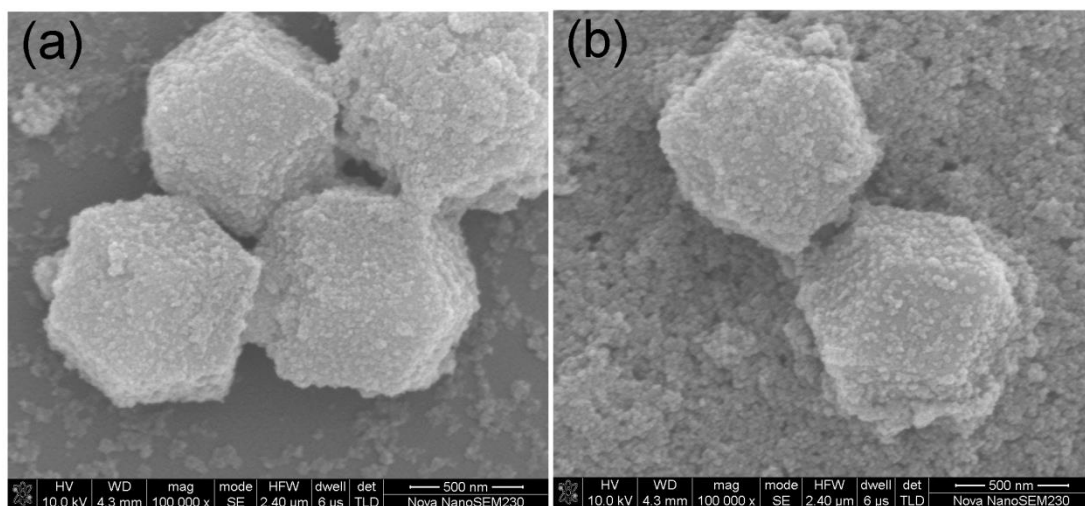

**Figure S4** SEM images of NQD/NC electrode after (a) 500 cycles, (b) 1000 cycles at the current density of  $1 \text{ A g}^{-1}$ .

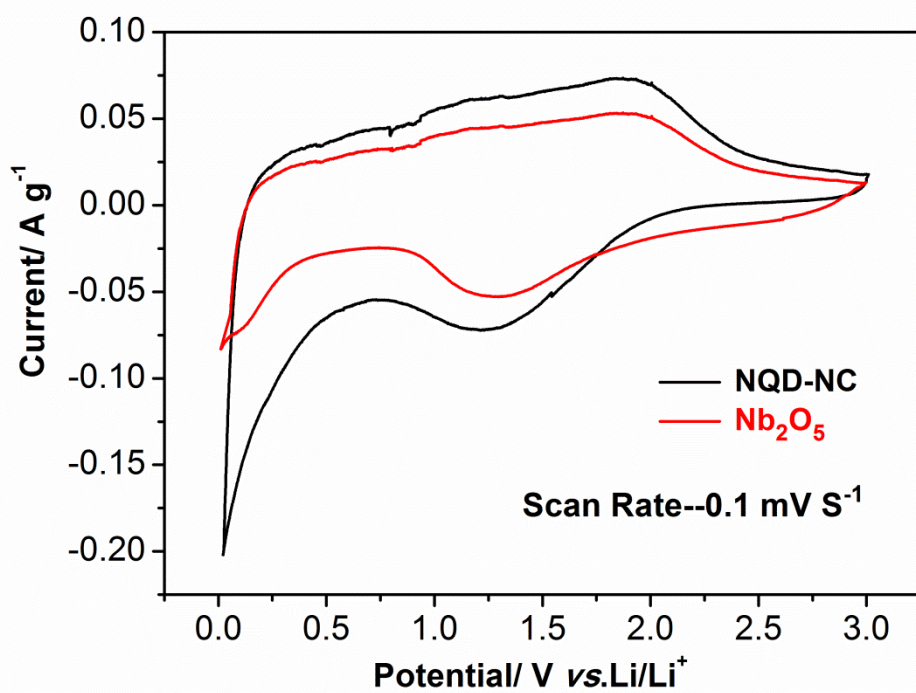

**Figure S5** CV curves of NQD-NC and pure Nb<sub>2</sub>O<sub>5</sub> sample at sweep rates of 0.1 mV S<sup>-1</sup> in the potential range of 0.01-3.0 V (vs. Li/Li<sup>+</sup>).

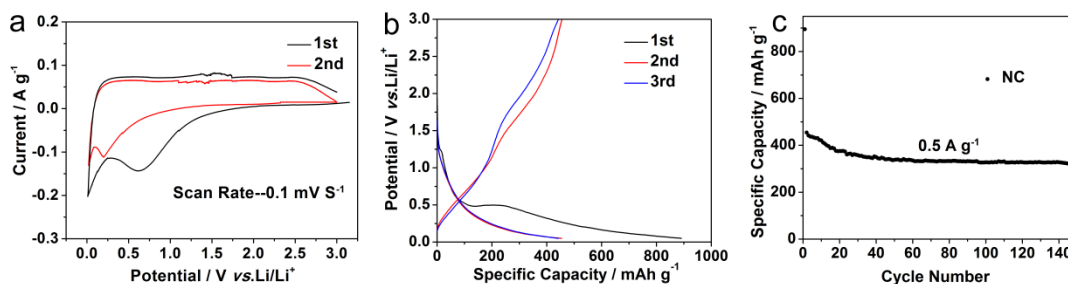

**Figure S6** Electrochemical performance of NC/Li half-cells in the potential range of 0.01-3.0 V (vs.  $Li/Li^+$ ). (a) CV curves of NC at a sweep rates  $0.1 \text{ mV S}^{-1}$ , (b) The selected discharge-charge curves of NC at  $0.5 \text{ A g}^{-1}$ , (c) Cycling performance of NC at  $0.5 \text{ A g}^{-1}$ .

The electrochemical performance of NC at a scan rate  $0.1 \text{ mV s}^{-1}$  in the voltage range of 0.01-3.0 V was evaluated in **Figure S6a**. The peaks of the first anodic scan are different from the second because of the formation of SEI and other side reactions. **Figure S6b** shows the discharge/charge profiles of the first three cycles for the NC at a current density of  $0.5 \text{ A g}^{-1}$ . The discharge curve in the first cycle is  $851 \text{ mA h g}^{-1}$ , while its first reversible specific capacity is only  $455 \text{ mA h g}^{-1}$ , an initial coulombic efficiency is only 53.5%. **Figure S6c** displays the cyclic stability of NC. After 150 cycles, the electrode maintains a discharge capacity of  $317 \text{ mA h g}^{-1}$ , which is approximately 70% of the second lap. As the discharge plateau of NC is between 0.01-0.5 V, it may contribute part of total capacity for NQD-NC nanocomposites in the voltage range of 0.01-3.0 V.

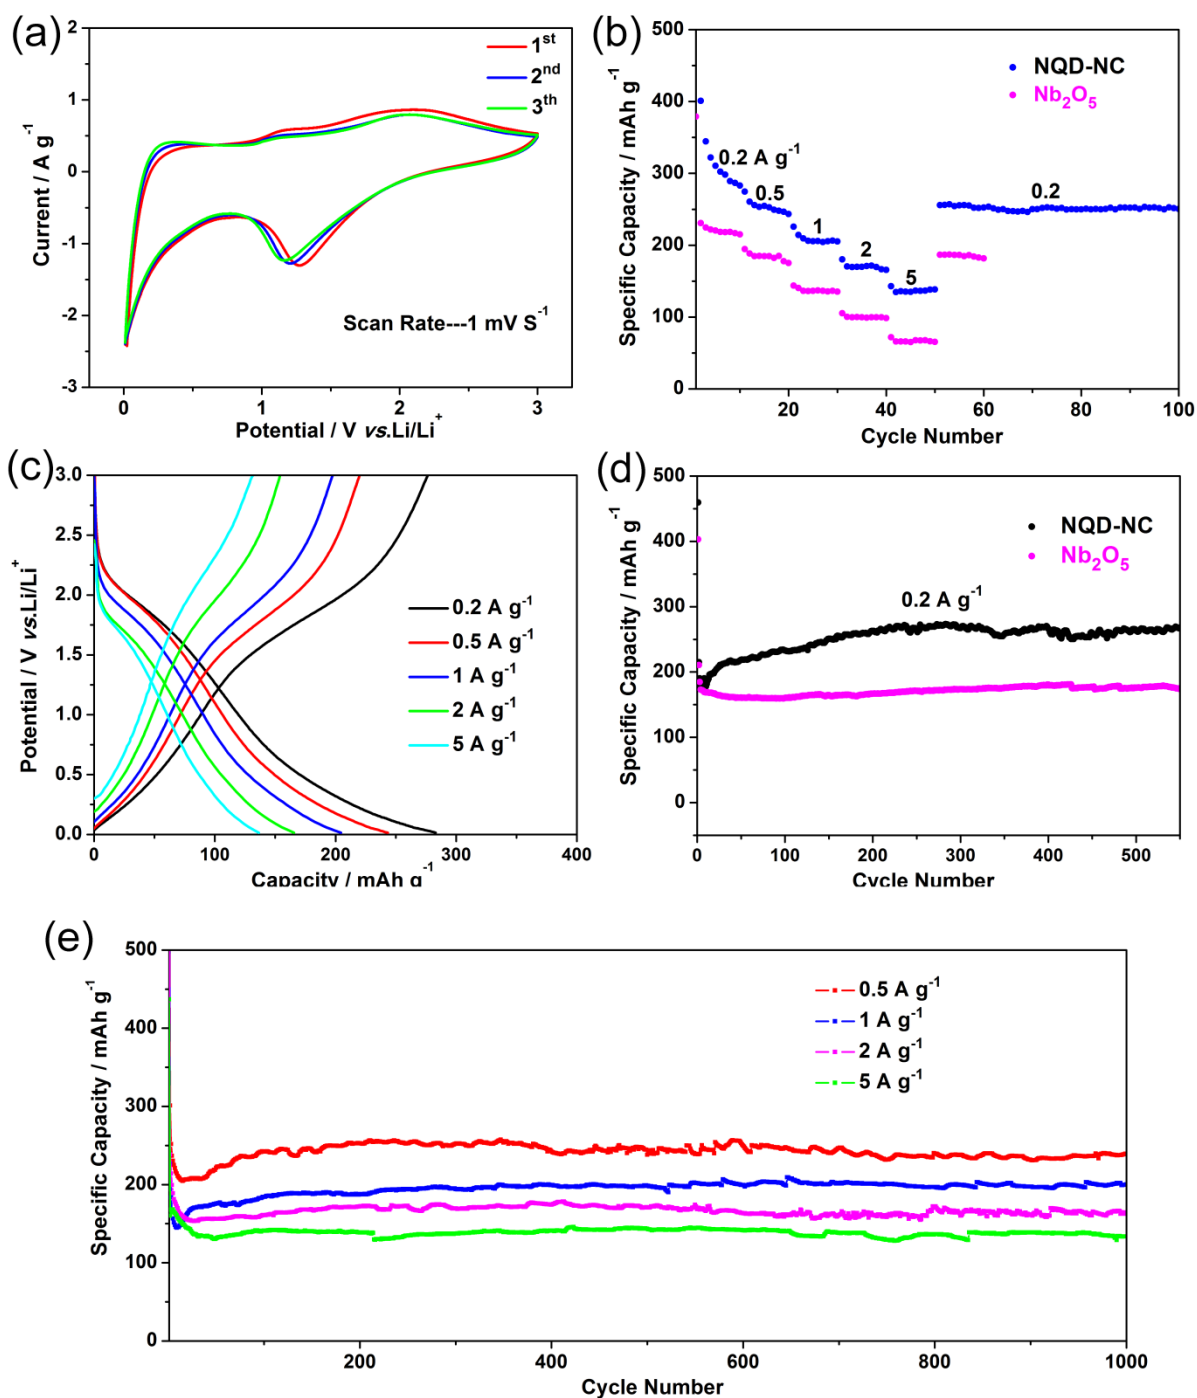

**Figure S7** Electrochemical performance of NQD-NC/Li half-cells in the potential range of 0.01-3.0 V (vs.  $Li/Li^+$ ). (a) The first three CV curves of NQD-NC at sweep rates of 1 mV S<sup>-1</sup>, (b) Rate performance (from 0.2-5 A g<sup>-1</sup>) of NQD-NC and pure Nb<sub>2</sub>O<sub>5</sub>, (c) The selected discharge-charge curves at different current densities of 0.2, 0.5, 1, 2 and 5 A g<sup>-1</sup>, (d) Galvanostatic charge-discharge profiles of NQD-NC and pure Nb<sub>2</sub>O<sub>5</sub> at 0.2 A g<sup>-1</sup>, (e) Galvanostatic charge-discharge profiles of NQD-NC at 0.5 A g<sup>-1</sup> and 1 A g<sup>-1</sup>.



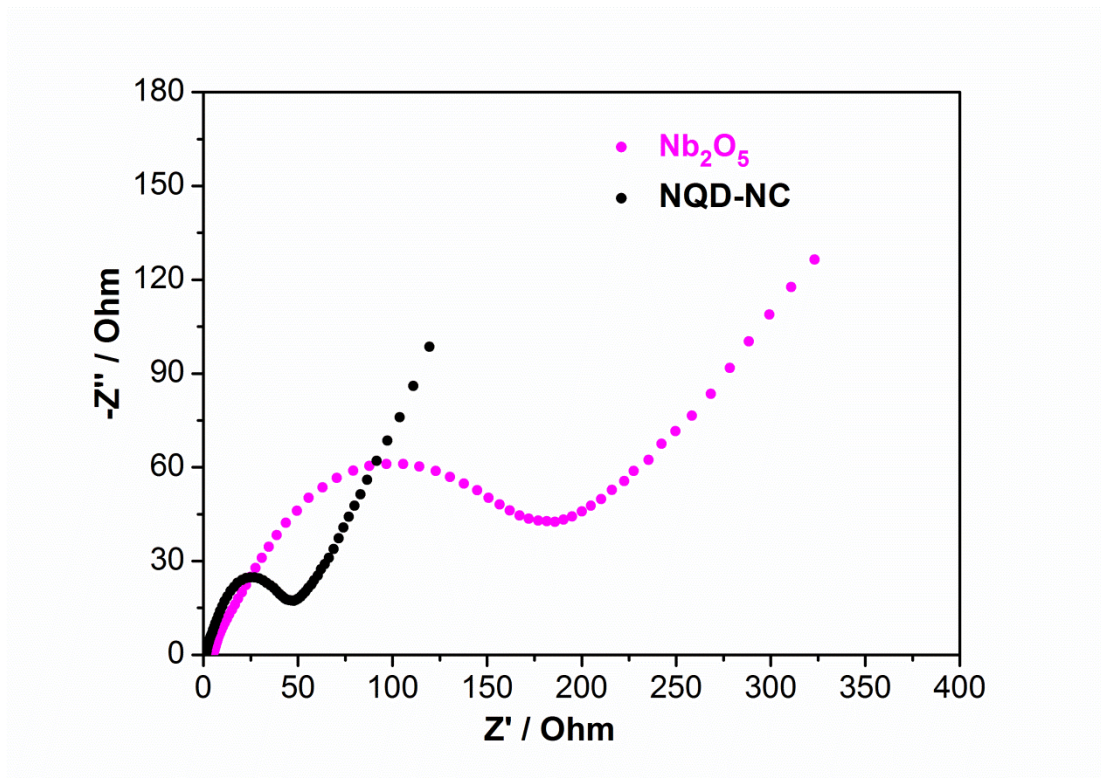

**Figure S8** Electrochemical impedance spectroscopy of LIBs employing the NQD-NC composite and pure  $\text{Nb}_2\text{O}_5$  anodes.

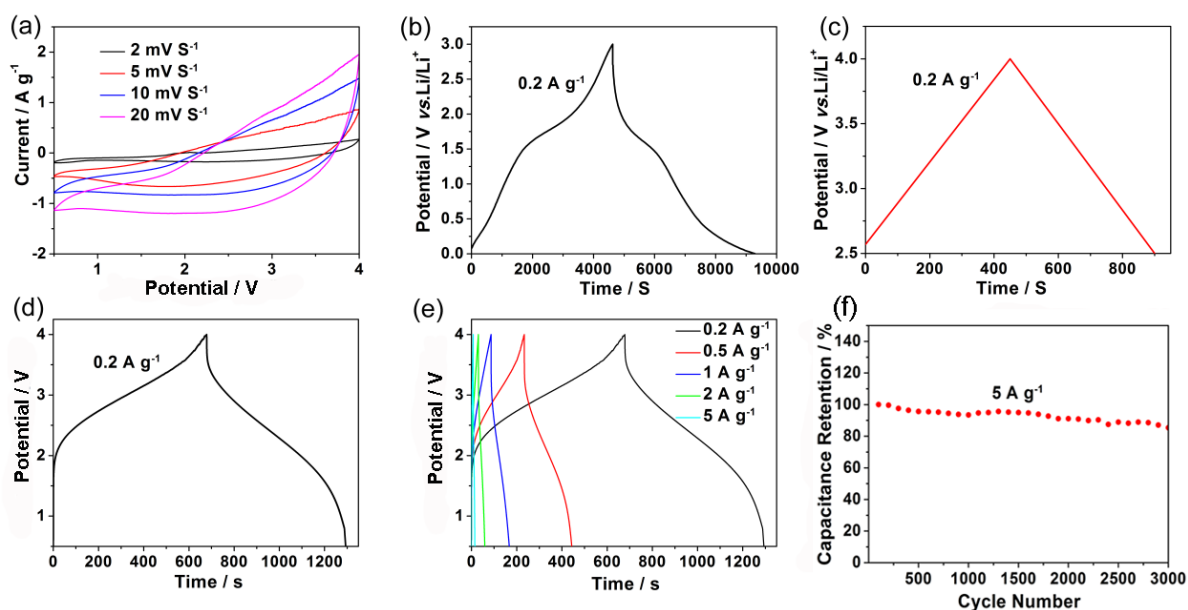

**Figure S9** (a) CV curves at different scan rates between 2 and 20 mV S<sup>-1</sup> with potential range of 0.5–4.0 V, (b) Charge-discharge profile of NQD-NC/Li half-cells in the potential range of 0.01–3.0 V (*vs. Li/Li*<sup>+</sup>) at 0.2 A g<sup>-1</sup>, (c) Charge-discharge profile of AC/Li half-cells in the voltage range of 2.5–4.0 V (*vs. Li/Li*<sup>+</sup>) at 0.2 A g<sup>-1</sup>, (d) Charge-discharge profile of AC//NQD-NC hybrid supercapacitor in the voltage range of 0.5–4.0 V at 0.2 A g<sup>-1</sup>, (e) Charge-discharge profiles of AC//NQD-NC HSCs device in the potential range of 0.5–4.0 V at different current densities of 0.2, 0.5, 1, 2 and 5 A g<sup>-1</sup>, (f) Cycle stability for around 3000 cycles at the current density of 5 A g<sup>-1</sup>.
